# Supplementary material for: The Brazilian version of the 20-item rapid estimate of adult literacy in medicine and dentistry
Source: PeerJ. 2017 Aug 29;5:e3744. doi: 10.7717/peerj.3744 (PMC5580381; doi:10.7717/peerj.3744)
Supplement: Supplemental Information 1 [file peerj-05-3744-s001.xlsx]

## Sheet: Recovered_Sheet1
Participant	Age	Gender	Race	Dic. Race	Education	Dic. Education	Occupation	Dic. Occupation	Self-reported oral health	Dic. Self-reported oral health	Last dental Visit	Dic. Last dental visit	Reason for dental visit	Word "Caries"	Word "Denture"	Word "Hygiene"	Word "Fatigue"	Word "Anemia"	Word "Calculus"	Word "Covenant"	Word "Allergic"	Word "Depression"	Word "Anesthetic"	Word "Extraction"	Word "Abscess"	Word "Instruction"	Word "Colitis"	Word "Constipation"	Word "Osteoporosis"	Word "Gingivitis"	Word "Amalgam"	Word "Periodontitis"	Word "Jaundice"	REALMD-20	BREALD-30	BNFLI
1	23	0	0	1	4	0	2	0	2	1	0	1	0	1	1	1	1	1	1	1	1	1	1	1	1	1	1	1	0	0	0	1	0	16	19	9
2	44	0	2	0	4	0	2	0	2	1	2	0	0	1	1	1	1	1	1	1	1	1	1	1	1	1	1	1	1	1	1	1	0	19	28	6
3	20	1	0	1	5	1	1	1	1	1	0	1	1	1	1	1	1	1	1	1	1	1	1	1	1	1	1	1	1	1	1	1	1	20	28	9
4	26	1	0	1	3	0	2	0	2	1	0	1	1	1	1	1	1	1	1	1	1	1	1	1	1	0	1	1	0	1	0	0	1	16	25	9
5	18	0	0	1	4	0	2	0	1	1	0	1	0	1	1	1	1	1	1	1	1	1	1	1	1	1	1	1	1	1	1	1	1	20	28	10
6	61	0	0	1	1	0	2	0	4	0	0	1	0	1	1	1	1	1	1	1	1	1	1	1	0	1	1	1	0	0	0	0	0	14	22	6
7	19	0	0	1	4	0	2	0	1	1	1	0	0	1	1	1	1	1	1	1	1	1	1	1	1	1	1	1	1	1	1	1	1	20	30	10
8	28	1	0	1	7	1	1	1	0	1	0	1	1	1	1	1	1	1	1	1	1	1	1	1	1	1	1	1	1	1	1	1	1	20	30	9
9	21	1	0	1	4	0	2	0	3	0	0	1	0	1	1	1	1	1	1	1	1	1	1	1	1	1	1	1	1	1	1	0	0	18	27	10
10	24	1	0	1	4	0	2	0	0	1	0	1	0	1	1	1	1	1	1	1	1	1	1	1	1	1	1	1	1	1	1	1	1	20	30	10
11	20	1	1	0	4	0	2	0	2	1	0	1	1	1	1	1	1	1	1	1	1	1	1	1	1	1	1	1	1	1	1	0	0	18	26	10
12	19	1	0	1	4	0	2	0	2	1	0	1	1	1	1	1	1	1	1	1	1	1	1	1	1	1	1	1	1	1	0	0	0	17	27	9
13	21	1	0	1	3	0	2	0	3	0	0	1	1	1	1	1	1	1	1	1	1	1	1	1	1	1	1	1	0	1	1	0	0	17	24	7
14	50	1	2	0	4	0	2	0	1	1	0	1	1	1	1	1	1	1	1	1	1	1	1	1	1	1	1	1	1	1	1	1	1	20	29	10
15	38	1	0	1	1	0	2	0	2	1	0	1	1	1	1	1	1	1	1	1	0	1	1	1	0	0	0	0	1	0	1	0	0	12	17	7
16	52	1	0	1	3	0	2	0	2	1	0	1	0	1	1	1	1	1	1	1	1	1	1	1	1	1	1	0	1	1	0	1	0	17	27	4
17	39	0	2	0	4	0	2	0	4	0	1	0	0	1	1	1	1	1	1	1	1	1	0	1	0	1	1	1	1	1	1	0	0	16	26	8
18	32	0	0	1	4	0	2	0	3	0	0	1	0	1	1	1	1	1	1	1	1	1	1	1	1	1	1	1	1	1	0	0	1	18	28	10
19	34	1	0	1	7	1	1	1	1	1	0	1	1	1	1	1	1	1	1	1	1	1	1	1	1	1	1	1	1	1	1	1	1	20	30	9
20	51	0	0	1	4	0	2	0	3	0	0	1	0	1	1	1	1	1	1	1	1	1	1	1	1	1	1	1	1	1	1	1	1	20	27	10
21	20	0	0	1	3	0	2	0	3	0	0	1	0	1	1	1	1	1	1	1	1	1	1	1	1	1	1	0	1	1	0	1	0	17	21	4
22	41	1	0	1	2	0	2	0	5	0	0	1	0	1	1	1	1	1	1	1	1	1	1	1	1	1	1	1	1	1	1	0	0	18	26	5
23	66	1	0	1	4	0	2	0	2	1	0	1	0	1	1	1	1	1	1	1	1	1	1	1	1	1	1	1	1	1	1	0	0	18	24	7
24	33	1	0	1	4	0	2	0	4	0	0	1	0	1	1	1	1	1	1	1	1	1	1	1	0	1	0	1	1	1	0	1	0	16	20	6
25	19	1	0	1	4	0	2	0	1	1	0	1	1	1	1	1	1	1	1	1	1	1	1	1	0	1	1	1	1	1	0	0	0	16	23	9
26	36	1	2	0	1	0	2	0	2	1	0	1	0	1	1	1	1	1	1	1	1	1	1	1	1	1	1	1	1	1	0	0	0	17	22	1
27	20	1	1	0	4	0	2	0	2	1	0	1	1	1	1	1	1	1	1	1	1	1	1	1	1	1	1	1	1	1	1	1	0	19	25	8
28	56	0	1	0	2	0	2	0	4	0	1	0	0	1	1	1	1	1	1	1	1	1	1	1	1	0	1	1	1	1	1	0	0	17	22	7
29	50	0	0	1	1	0	2	0	3	0	0	1	0	1	1	1	1	1	1	1	1	1	1	1	1	1	1	0	1	1	0	0	0	16	24	5
30	26	0	0	1	4	0	2	0	2	1	0	1	0	1	1	1	1	1	1	1	1	1	1	1	1	1	1	1	1	1	1	1	1	20	28	8
31	21	1	0	1	4	0	2	0	2	1	0	1	0	1	1	1	1	1	1	1	1	1	1	1	1	1	1	1	1	1	1	0	1	19	27	10
32	41	0	0	1	5	1	2	0	3	0	1	0	0	1	1	1	1	1	1	1	1	1	1	1	1	1	1	1	1	1	1	1	1	20	30	10
33	40	0	0	1	2	0	2	0	2	1	0	1	0	1	1	1	1	1	1	1	1	1	0	1	1	1	1	0	1	1	1	1	1	18	23	7
34	58	1	0	1	2	0	2	0	2	1	0	1	1	1	1	1	1	1	1	1	1	1	1	1	0	1	1	1	0	0	0	0	0	14	18	5
35	42	0	0	1	4	0	2	0	2	1	0	1	1	1	1	1	1	1	1	1	1	1	1	1	1	1	1	1	1	1	1	1	0	19	24	10
36	51	1	0	1	4	0	2	0	3	0	0	1	0	1	1	1	1	1	1	1	1	1	1	1	1	1	1	1	1	0	0	1	0	17	27	8
37	23	1	0	1	3	0	2	0	3	0	2	0	0	1	1	1	1	1	1	1	1	1	1	1	1	1	1	1	1	1	0	1	1	19	25	9
38	53	1	0	1	3	0	2	0	3	0	0	1	0	1	1	1	0	0	0	0	1	1	0	1	1	1	1	0	0	0	0	0	0	9	12	3
39	29	0	0	1	6	1	2	0	2	1	0	1	0	1	1	1	1	1	1	1	1	1	1	1	1	1	1	1	1	1	1	1	0	19	27	8
40	40	0	1	0	5	1	2	0	3	0	0	1	0	0	1	1	1	1	1	1	1	1	1	1	1	1	1	1	1	1	1	0	0	17	26	9
41	74	0	0	1	4	0	0	1	3	0	1	0	0	1	1	1	1	1	1	1	1	1	1	1	1	1	1	1	1	1	1	1	1	20	27	10
42	32	0	1	0	3	0	2	0	4	0	0	1	0	1	1	1	1	1	0	1	0	1	0	0	1	0	0	0	0	0	0	0	0	8	12	5
43	36	0	2	0	3	0	2	0	3	0	2	0	0	1	1	1	1	1	1	1	1	1	1	1	0	1	1	0	0	0	0	0	0	13	19	7
44	26	1	1	0	1	0	2	0	4	0	2	0	0	1	1	1	0	1	1	1	1	1	1	1	1	1	0	0	1	1	0	0	0	14	10	4
45	19	0	0	1	4	0	1	1	2	1	0	1	0	1	1	1	1	1	1	1	1	1	1	1	1	1	1	1	1	1	1	0	1	19	29	10
46	46	0	0	1	5	1	2	0	1	1	0	1	1	1	1	1	1	1	1	1	1	1	1	1	1	1	1	1	1	1	0	1	0	18	26	9
47	24	0	0	1	6	1	2	0	0	1	0	1	1	1	1	1	1	1	1	1	1	1	1	1	1	1	1	1	1	1	1	1	1	20	30	10
48	35	1	0	1	4	0	2	0	2	1	0	1	0	1	1	1	1	1	1	1	1	1	1	1	1	1	1	1	1	1	0	0	1	18	25	10
49	45	0	2	0	4	0	2	0	3	0	1	0	0	1	1	1	1	1	1	1	1	1	1	1	1	1	1	1	1	0	1	0	1	18	22	9
50	47	1	0	1	4	0	2	0	2	1	0	1	0	1	1	1	1	1	1	1	1	1	1	1	0	1	1	1	1	1	0	1	0	17	26	8
51	21	1	2	0	4	0	2	0	3	0	0	1	1	1	1	1	1	1	1	1	1	1	1	1	1	1	1	1	0	1	1	1	0	18	25	8
52	35	1	0	1	1	0	2	0	3	0	0	1	0	1	1	1	1	1	1	1	1	1	1	1	0	1	1	1	1	1	0	0	0	16	21	8
53	25	0	0	1	6	1	2	0	1	1	0	1	1	1	1	1	1	1	1	1	0	1	1	1	1	1	1	1	0	1	1	1	0	17	28	9
54	26	1	0	1	4	0	2	0	2	1	0	1	0	1	1	1	1	1	1	1	1	1	1	1	1	1	1	1	1	1	0	1	0	18	26	9
55	30	0	2	0	4	0	2	0	3	0	2	0	0	1	1	1	1	1	1	1	1	1	1	1	1	1	1	0	1	1	0	1	0	17	24	6
56	28	0	0	1	4	0	2	0	3	0	0	1	0	1	1	1	1	1	1	1	1	1	0	1	0	1	1	1	0	1	0	0	0	14	23	7
57	18	0	0	1	4	0	2	0	1	1	0	1	0	1	1	1	1	1	1	1	1	1	1	1	1	1	1	1	1	1	1	1	0	20	28	10
58	23	0	0	1	6	1	1	1	0	1	0	1	1	1	1	1	1	1	1	1	1	1	1	1	1	0	1	1	1	1	1	1	1	19	28	9
59	53	0	0	1	4	0	0	1	3	0	1	0	0	1	1	1	1	1	1	1	0	1	1	1	1	1	1	1	1	1	1	1	1	19	27	4
60	35	1	0	1	5	1	2	0	4	0	1	0	0	1	1	1	1	1	1	1	1	1	1	1	1	0	1	0	1	1	0	1	1	17	30	10
61	70	0	0	1	1	0	2	0	3	0	0	1	1	1	1	1	1	1	1	1	1	1	1	1	1	1	1	1	0	0	0	0	1	16	19	7
62	40	0	0	1	7	1	2	0	1	1	0	1	0	1	1	1	1	1	1	1	1	1	1	1	1	1	1	1	1	1	1	1	1	20	30	9
63	44	0	0	1	7	1	2	0	3	0	0	1	1	1	1	1	1	1	1	1	1	1	1	1	1	1	1	1	0	1	1	0	1	18	28	8
64	18	1	0	1	5	1	2	0	2	1	0	1	1	1	1	1	1	1	1	1	1	1	1	1	1	1	1	1	1	1	1	1	0	19	30	9
65	42	0	1	0	2	0	2	0	3	0	0	1	0	1	1	1	1	1	1	1	1	1	1	1	1	1	1	1	1	1	0	0	0	17	28	9
66	22	0	0	1	4	0	2	0	2	1	0	1	0	1	1	1	1	1	1	1	1	1	1	1	1	1	1	1	1	1	1	0	1	19	26	8
67	77	1	0	1	1	0	2	0	2	1	0	1	1	1	1	1	1	1	1	1	1	1	1	1	0	1	1	0	1	1	0	1	1	17	18	3
68	41	1	1	0	3	0	2	0	4	0	0	1	0	1	1	1	1	1	1	1	1	1	1	1	0	1	0	0	0	0	0	0	0	12	24	7
69	53	1	1	0	2	0	2	0	2	1	2	0	0	1	1	1	1	1	1	1	1	1	1	1	1	1	1	1	1	1	0	1	1	19	24	5
70	31	0	0	1	7	1	2	0	3	0	2	0	0	1	1	1	1	1	1	1	1	1	1	1	0	1	1	1	1	1	1	1	1	19	28	10
71	64	1	0	1	4	0	2	0	1	1	0	1	0	1	1	1	1	1	1	1	1	1	1	1	1	1	1	1	1	1	1	1	1	20	28	7
72	38	0	0	1	2	0	2	0	0	1	0	1	1	1	1	1	1	1	1	1	1	1	1	1	0	1	1	1	1	1	1	1	1	19	26	8
73	50	1	0	1	4	0	2	0	3	0	2	0	0	1	1	1	1	1	1	1	1	1	1	1	1	1	1	1	1	1	0	1	0	18	29	9
74	26	1	0	1	3	0	2	0	3	0	0	1	0	1	1	1	1	1	1	1	1	1	1	1	0	1	1	1	1	1	0	1	0	17	23	7
75	27	1	1	0	4	0	2	0	3	0	0	1	1	1	1	1	1	1	1	1	1	1	1	1	1	1	1	1	1	1	1	0	1	19	29	10
76	55	1	0	1	5	1	2	0	4	0	0	1	0	1	1	1	1	1	1	1	1	1	1	1	1	1	1	1	1	1	1	1	0	19	27	8
77	21	1	0	1	3	0	2	0	2	1	5	0	0	1	1	1	1	1	1	1	1	1	1	1	1	0	1	1	1	1	0	0	0	16	22	5
78	22	1	0	1	3	0	2	0	3	0	0	1	1	1	1	1	1	1	1	1	0	1	1	1	1	1	1	1	0	1	0	0	0	15	24	7
79	21	1	0	1	2	0	2	0	0	1	3	0	1	1	1	1	1	1	1	1	1	1	1	1	1	1	1	1	1	1	0	1	0	18	25	6
80	60	1	0	1	2	0	2	0	3	0	0	1	1	1	1	1	1	1	1	1	1	1	1	1	0	1	1	1	1	1	0	1	1	18	20	8
81	22	0	0	1	6	1	1	1	0	1	0	1	0	1	1	1	1	1	1	1	1	1	1	1	1	1	1	0	1	1	1	1	1	19	30	9
82	26	0	0	1	6	1	2	0	0	1	0	1	1	1	1	1	1	1	1	1	1	1	1	1	1	1	1	1	1	1	1	1	0	19	29	10
83	63	0	2	0	1	0	2	0	2	1	0	1	1	1	1	1	1	1	1	1	1	1	1	1	1	1	1	1	1	1	1	0	0	18	23	7
84	26	1	0	1	6	1	1	1	1	1	0	1	1	1	1	1	1	1	1	1	1	1	1	1	1	1	1	1	1	1	1	1	1	20	28	9
85	34	1	0	1	3	0	2	0	3	0	0	1	0	1	1	1	1	1	1	1	1	1	1	1	1	1	0	1	1	1	0	0	0	16	23	10
86	55	1	2	0	2	0	2	0	3	0	0	1	0	1	1	1	1	1	1	1	1	1	1	1	0	0	1	0	0	0	0	0	0	12	13	5
87	23	0	0	1	2	0	2	0	3	0	1	0	0	1	1	1	1	1	1	1	1	1	1	1	1	1	1	0	1	1	0	0	0	16	26	8
88	19	0	0	1	4	0	2	0	0	1	1	0	0	1	1	1	1	1	1	1	1	1	1	1	1	1	1	1	1	1	0	1	0	18	29	9
89	30	1	0	1	4	0	2	0	3	0	0	1	0	1	1	1	1	1	1	1	1	1	1	1	1	1	0	1	0	1	0	1	0	16	25	8
90	51	1	0	1	4	0	2	0	0	1	0	1	1	1	1	1	1	1	1	1	1	1	1	1	1	1	1	1	1	1	1	1	1	20	23	9
91	33	1	0	1	1	0	2	0	3	0	3	0	0	1	0	0	1	1	1	1	1	1	1	0	0	1	0	0	0	0	0	0	0	9	23	6
92	26	0	0	1	7	1	2	0	0	1	0	1	1	1	1	1	1	1	1	1	1	1	1	1	1	1	1	1	1	1	0	1	1	19	25	8
93	45	0	0	1	1	0	2	0	4	0	2	0	0	1	1	1	1	1	1	1	1	1	0	1	1	1	1	1	1	1	0	0	0	16	22	5
94	39	0	2	0	4	0	0	1	2	1	1	0	0	1	1	1	1	1	1	1	1	1	1	1	1	1	1	1	1	1	0	1	0	18	28	7
95	21	1	0	1	5	1	2	0	1	1	0	1	0	1	1	1	1	1	1	1	1	1	1	1	0	1	1	1	1	1	0	0	0	16	20	6
96	33	1	0	1	3	0	2	0	2	1	0	1	0	1	1	1	1	1	1	1	1	1	1	1	1	1	1	0	0	1	0	0	0	15	20	5
97	69	0	0	1	4	0	2	0	1	1	0	1	0	1	1	1	1	1	1	1	1	1	1	1	1	1	1	1	1	1	1	0	1	19	27	10
98	29	0	0	1	7	1	2	0	0	1	0	1	0	1	1	1	1	1	1	1	1	1	1	1	1	1	1	1	0	1	1	1	1	19	29	8
99	20	0	2	0	4	0	0	1	1	1	0	1	0	1	1	1	1	1	1	1	1	1	1	1	1	1	1	1	0	1	0	1	1	18	30	10
100	18	1	2	0	5	1	2	0	2	1	0	1	0	1	1	1	1	1	1	1	1	1	1	1	1	1	1	1	1	1	0	1	0	18	28	9
101	18	1	3	0	5	1	2	0	2	1	0	1	0	1	1	1	1	1	1	1	1	1	1	1	1	1	1	1	1	1	1	1	1	20	28	9
102	54	0	0	1	4	0	2	0	3	0	0	1	1	1	1	1	1	1	1	1	1	1	1	1	1	1	1	1	1	1	0	1	1	19	28	9
103	20	0	0	1	4	0	2	0	2	1	0	1	0	1	1	1	1	1	1	1	1	1	1	1	1	1	1	1	1	1	1	1	0	19	29	10
104	18	0	0	1	4	0	2	0	2	1	1	0	0	1	1	1	1	1	1	1	1	1	1	1	0	1	1	1	1	1	1	1	1	19	29	9
105	26	0	0	1	6	1	2	0	0	1	2	0	0	1	1	1	1	1	1	1	1	1	1	1	1	1	1	1	1	1	1	1	1	20	23	8
106	25	0	0	1	5	1	2	0	0	1	3	0	0	1	1	1	1	1	1	1	1	1	1	1	1	1	1	1	1	1	1	0	0	18	26	10
107	26	1	0	1	3	0	2	0	2	1	0	1	0	1	1	1	1	1	1	1	1	1	1	1	1	1	1	1	1	1	1	1	1	20	29	9
108	38	1	0	1	2	0	2	0	1	1	0	1	1	1	1	1	1	1	1	1	1	1	1	1	1	1	1	1	1	1	1	1	1	20	27	10
109	58	0	0	1	6	1	2	0	3	0	0	1	0	1	1	1	1	1	1	1	1	1	1	1	1	1	1	1	1	1	1	1	1	20	30	9
110	72	1	0	1	1	0	2	0	4	0	0	1	0	1	1	1	1	1	1	1	1	1	1	1	0	1	1	1	1	1	1	1	1	19	25	9
111	31	0	2	0	1	0	2	0	4	0	3	0	0	1	1	1	1	1	0	1	1	1	0	0	1	1	0	0	0	0	0	0	0	10	14	4
112	29	1	0	1	4	0	2	0	3	0	0	1	1	1	1	1	1	1	1	1	1	1	1	1	1	1	1	1	1	1	0	1	1	19	23	9
113	46	0	0	1	3	0	2	0	2	1	2	0	0	1	1	1	1	1	1	1	1	1	1	1	0	1	1	1	1	1	1	0	0	17	22	8
114	46	1	0	1	7	1	1	1	2	1	0	1	1	1	1	1	1	1	1	1	1	1	1	1	1	1	1	1	1	1	1	1	1	20	30	9
115	42	0	0	1	5	1	2	0	4	0	0	1	0	1	1	1	1	1	1	1	1	1	1	1	1	1	1	1	1	1	0	1	1	19	28	7
116	58	0	0	1	7	1	2	0	2	1	0	1	0	1	1	1	1	1	1	1	1	1	1	1	1	1	1	1	1	1	1	1	1	20	30	10
117	30	0	0	1	7	1	2	0	1	1	0	1	1	1	1	1	1	1	1	1	1	1	1	1	1	1	1	1	1	1	1	1	0	19	28	10
118	66	1	0	1	1	0	2	0	3	0	0	1	0	1	1	1	1	1	1	1	1	1	1	1	1	0	1	1	1	1	0	0	0	16	21	6
119	70	1	0	1	3	0	2	0	2	1	0	1	1	1	1	1	1	1	1	1	1	1	1	1	1	1	1	1	1	1	1	1	1	20	28	5
120	55	1	0	1	4	0	2	0	2	1	0	1	0	1	1	1	1	1	1	1	1	1	1	1	1	1	1	1	1	1	1	0	1	19	24	7
121	55	1	0	1	1	0	2	0	4	0	0	1	0	1	1	1	1	1	1	1	1	1	1	1	1	1	1	1	1	1	0	0	1	18	18	8
122	35	1	0	1	3	0	2	0	4	0	0	1	0	1	1	1	1	1	1	1	1	1	1	1	1	1	1	1	0	1	0	0	1	17	29	7
123	65	1	0	1	2	0	2	0	0	1	0	1	1	1	1	1	1	1	1	1	1	1	1	1	0	1	1	1	1	1	0	1	0	17	17	6
124	59	1	2	0	1	0	2	0	4	0	0	1	0	1	1	1	1	1	1	1	1	1	1	1	1	1	1	1	1	1	1	1	0	19	21	6
125	55	1	0	1	2	0	2	0	3	0	0	1	1	1	1	1	1	1	1	1	1	1	1	1	1	1	1	1	1	1	1	1	1	20	27	7
126	60	1	0	1	1	0	2	0	2	1	2	0	0	1	1	1	1	1	1	1	1	1	1	1	0	1	1	1	1	1	0	1	0	17	23	5
127	51	1	1	0	4	0	2	0	3	0	0	1	1	1	1	1	1	1	1	1	1	1	1	1	1	1	1	1	1	0	0	0	0	16	25	8
128	19	1	0	1	5	1	2	0	1	1	0	1	1	1	1	1	1	1	1	1	1	1	1	1	1	1	1	1	1	1	1	1	1	20	30	10
129	23	1	0	1	6	1	1	1	1	1	0	1	1	1	1	1	1	1	1	1	1	1	1	1	1	1	1	1	1	1	1	1	0	19	30	10
130	23	1	1	0	5	1	0	1	2	1	3	0	1	1	1	1	1	1	1	1	1	1	1	1	1	1	1	1	1	1	1	1	1	20	27	8
131	39	1	0	1	5	1	2	0	2	1	0	1	0	1	1	1	1	1	1	1	1	1	1	1	1	1	1	1	1	1	0	1	0	18	29	8
132	34	1	0	1	3	0	2	0	3	0	0	1	1	1	1	1	1	0	1	1	1	0	0	1	0	0	1	0	0	1	0	0	0	10	12	5
133	52	1	0	1	3	0	2	0	3	0	0	1	0	1	1	1	1	1	1	1	1	1	1	1	1	1	1	1	1	1	0	0	0	17	17	2
134	40	0	0	1	7	1	1	1	0	1	0	1	0	1	1	1	1	1	1	1	1	1	1	1	1	1	1	1	1	1	1	1	1	20	30	9
135	50	1	0	1	4	0	2	0	3	0	0	1	1	1	1	1	1	1	1	1	1	1	1	1	1	1	1	1	0	1	1	0	1	18	24	7
136	31	0	2	0	4	0	2	0	2	1	0	1	1	1	1	1	1	1	1	1	1	1	1	1	0	1	1	0	0	0	0	0	0	13	19	5
137	36	0	0	1	4	0	2	0	2	1	0	1	0	1	1	1	1	1	1	1	1	1	1	1	0	1	1	1	1	1	0	0	0	16	29	10
138	36	1	2	0	1	0	2	0	3	0	0	1	0	1	1	1	1	1	1	1	1	1	1	1	1	1	1	1	1	1	0	1	0	18	26	5
139	27	0	1	0	6	1	1	1	1	1	0	1	1	1	1	1	1	1	1	1	1	1	1	1	1	1	1	1	1	1	1	1	1	20	30	10
140	28	1	0	1	6	1	1	1	2	1	0	1	0	1	1	1	1	1	1	1	1	1	1	1	1	1	1	1	1	1	0	1	1	19	28	9
141	42	0	1	0	2	0	2	0	4	0	0	1	0	1	1	1	1	1	1	1	1	1	1	1	1	1	1	1	1	1	0	1	1	19	22	5
142	22	1	2	0	2	0	2	0	3	0	0	1	0	1	1	1	1	1	1	1	1	1	1	1	1	1	1	0	0	1	1	0	0	16	21	6
143	28	1	2	0	5	1	2	0	3	0	0	1	0	1	1	1	1	1	1	1	1	1	1	1	1	1	0	1	0	1	1	0	1	17	25	8
144	30	1	0	1	4	0	2	0	2	1	0	1	0	1	1	1	1	1	1	1	1	1	1	1	1	1	1	1	1	1	1	1	0	19	26	7
145	45	0	0	1	2	0	2	0	3	0	3	0	0	1	1	1	1	1	1	1	1	1	1	1	0	1	1	1	1	1	1	0	0	17	24	10
146	71	1	0	1	1	0	2	0	3	0	0	1	0	1	1	1	1	1	0	0	0	1	1	1	0	0	1	0	0	0	0	0	0	9	17	1
147	47	0	0	1	1	0	2	0	2	1	0	1	0	1	1	1	1	1	1	1	1	1	1	1	1	1	1	1	1	1	0	0	0	17	26	5
148	51	1	2	0	2	0	2	0	3	0	0	1	0	1	1	1	1	1	1	1	1	1	1	1	0	1	1	0	0	0	0	0	0	13	19	6
149	80	0	2	0	1	0	2	0	2	1	0	1	0	1	1	1	1	1	1	1	1	1	1	1	1	1	1	1	0	1	0	0	0	16	17	5
150	51	1	0	1	2	0	2	0	4	0	0	1	0	1	1	1	1	1	1	1	1	1	1	1	1	1	1	1	1	1	0	1	0	18	22	8
151	19	0	0	1	3	0	2	0	2	1	0	1	0	1	1	1	1	1	1	1	0	1	0	1	1	1	0	0	1	1	0	1	1	15	20	4
152	23	1	0	1	4	0	2	0	3	0	1	0	0	1	1	1	1	1	1	1	1	1	1	1	1	1	1	1	1	1	1	0	0	18	25	9
153	55	0	2	0	3	0	2	0	3	0	0	1	0	1	1	1	1	1	1	1	1	1	1	1	1	1	1	0	1	1	0	1	0	17	24	4
154	54	0	0	1	4	0	2	0	2	1	0	1	1	1	1	1	1	1	1	1	1	1	1	1	1	1	1	1	1	1	1	1	1	20	28	7
155	51	0	0	1	4	0	2	0	2	1	0	1	1	1	1	1	0	1	0	1	0	1	1	1	0	1	1	1	1	1	0	1	0	14	21	6
156	21	0	0	1	5	1	2	0	0	1	0	1	0	1	1	1	1	1	1	1	1	1	1	1	1	1	1	1	1	1	1	1	1	20	30	8
157	23	0	0	1	7	1	2	0	2	1	0	1	1	1	1	1	1	1	1	1	1	1	1	1	1	1	0	1	1	1	0	0	0	16	25	8
158	25	0	0	1	7	1	1	1	1	1	0	1	1	1	1	1	1	1	1	1	1	1	1	1	1	1	1	1	1	1	1	1	1	20	30	9
159	71	0	0	1	2	0	2	0	2	1	2	0	0	1	1	1	1	1	1	1	1	1	1	1	1	1	1	1	1	1	1	1	1	20	30	8
160	52	0	2	0	2	0	2	0	3	0	0	1	0	1	1	1	1	1	1	1	1	1	1	1	1	1	1	1	1	1	1	1	1	20	29	8
161	54	0	0	1	7	1	2	0	1	1	0	1	1	1	1	1	1	1	1	1	1	1	1	1	1	1	1	1	1	1	1	0	1	19	29	8
162	60	1	0	1	4	0	2	0	5	0	0	1	0	1	1	1	1	1	1	1	1	1	1	1	1	1	1	1	1	1	1	1	0	19	27	8
163	64	0	0	1	1	0	2	0	3	0	1	0	0	0	1	1	1	1	1	1	0	1	0	1	1	1	0	1	0	1	0	0	0	12	19	7
164	21	1	0	1	5	1	1	1	2	1	0	1	1	1	1	1	1	1	1	1	1	1	1	1	1	1	1	1	1	1	1	1	1	20	30	10
165	20	0	0	1	5	1	2	0	3	0	0	1	0	1	1	1	1	1	1	1	1	1	1	1	1	1	1	1	1	1	0	0	0	17	29	8
166	36	0	0	1	4	0	2	0	3	0	1	0	0	1	1	1	1	1	1	1	0	1	1	1	1	1	1	1	0	1	0	1	0	16	17	7
167	72	1	0	1	1	0	2	0	3	0	0	1	0	1	1	1	1	1	1	1	1	1	1	1	1	1	1	1	1	1	0	0	1	18	22	5
168	40	1	0	1	1	0	2	0	4	0	0	1	0	1	1	1	1	1	1	0	1	1	1	1	1	1	1	0	0	0	0	0	0	13	16	6
169	34	1	0	1	2	0	2	0	2	1	0	1	0	1	1	1	1	1	1	1	1	1	1	1	1	1	1	1	1	1	1	1	1	20	29	10
170	38	0	0	1	4	0	2	0	2	1	0	1	1	1	1	1	1	1	1	1	1	1	1	1	1	1	1	1	1	1	1	1	1	20	24	10
171	38	1	1	0	2	0	2	0	2	1	1	0	0	1	1	1	1	1	1	1	1	1	1	1	0	1	0	0	0	1	0	0	0	13	18	5
172	43	0	1	0	4	0	2	0	1	1	0	1	0	1	1	1	1	1	1	1	1	1	1	1	1	1	1	1	1	1	1	1	1	20	29	9
173	37	1	0	1	4	0	2	0	3	0	0	1	0	1	1	1	1	1	1	1	1	1	1	1	1	1	1	1	1	1	0	0	0	17	26	8
174	38	1	2	0	1	0	2	0	3	0	2	0	1	1	1	1	1	1	1	1	1	1	1	1	1	1	1	1	1	1	0	1	1	19	20	9
175	48	1	2	0	4	0	2	0	2	1	0	1	0	1	1	1	1	1	1	1	1	1	1	1	1	1	1	1	1	1	0	1	1	19	24	9
176	62	0	2	0	1	0	2	0	4	0	3	0	1	1	1	1	1	0	1	1	1	1	1	1	0	1	1	1	1	1	0	0	0	15	18	8
177	54	1	0	1	6	1	2	0	4	0	0	1	0	1	1	1	1	1	1	1	1	1	1	1	1	1	1	1	1	1	1	1	1	20	23	9
178	37	0	0	1	6	1	1	1	2	1	0	1	0	1	1	1	1	1	1	1	1	1	1	1	1	1	1	0	1	1	1	0	1	18	25	2
179	34	1	1	0	2	0	2	0	3	0	1	0	1	1	1	1	1	1	1	1	1	1	1	0	0	1	1	1	1	1	0	1	0	16	22	7
180	38	1	0	1	4	0	2	0	0	1	0	1	1	1	1	1	1	1	1	1	1	1	1	1	1	1	1	1	1	1	0	0	0	17	24	4
181	31	1	0	1	1	0	2	0	3	0	0	1	0	1	1	1	1	1	0	1	0	1	0	1	0	0	0	0	0	0	0	0	0	8	15	8
182	33	1	0	1	2	0	2	0	3	0	0	1	0	1	1	1	1	1	1	1	1	1	1	1	0	1	1	1	1	1	0	1	1	18	24	7
183	50	1	0	1	4	0	2	0	2	1	0	1	0	1	1	1	1	1	1	1	1	1	1	1	1	1	1	1	1	1	1	1	0	19	26	9
184	59	1	0	1	4	0	2	0	2	1	0	1	0	1	1	1	1	1	1	1	1	1	1	1	1	1	1	1	0	1	0	0	1	17	24	5
185	31	1	0	1	6	1	2	0	2	1	0	1	1	1	1	1	1	1	1	1	1	1	1	1	1	1	1	1	1	1	1	0	1	19	27	10
186	48	1	0	1	4	0	2	0	3	0	0	1	0	1	1	1	1	1	1	1	1	1	1	1	1	1	1	1	1	1	1	1	0	19	24	7
187	33	1	0	1	6	1	2	0	0	1	0	1	1	1	1	1	1	1	1	1	1	1	1	1	1	1	1	1	1	1	1	1	1	20	28	10
188	45	0	2	0	1	0	2	0	3	0	0	1	0	1	1	1	1	0	0	1	1	0	0	1	0	1	0	0	0	1	0	0	0	9	9	8
189	50	0	0	1	1	0	2	0	2	1	0	1	1	1	1	1	1	1	1	1	1	1	1	1	1	1	1	1	0	1	0	0	1	17	23	9
190	44	1	0	1	6	1	2	0	2	1	1	0	1	1	1	1	1	1	1	1	1	1	1	1	1	1	1	1	1	1	1	1	1	20	30	8
191	35	1	0	1	1	0	2	0	3	0	1	0	0	1	1	1	1	1	1	1	1	1	1	1	0	1	1	1	0	1	0	0	0	15	17	8
192	46	1	0	1	3	0	0	1	0	1	0	1	1	1	1	1	1	1	1	1	1	1	1	1	1	1	1	1	1	1	1	1	1	20	30	7
193	51	0	0	1	4	0	2	0	3	0	0	1	1	1	1	1	1	1	1	1	1	1	1	1	1	1	1	0	1	1	1	1	0	18	23	7
194	34	1	0	1	3	0	2	0	3	0	0	1	0	1	1	1	1	1	1	1	1	1	1	1	1	1	1	1	1	1	1	0	0	18	29	6
195	51	1	0	1	1	0	2	0	2	1	0	1	0	1	1	1	1	1	1	1	1	1	1	1	1	1	1	1	1	1	0	0	0	17	23	6
196	31	0	0	1	6	1	1	1	0	1	1	0	1	1	1	1	1	1	1	1	1	1	1	1	1	1	1	1	1	1	1	1	1	20	30	10
197	56	1	1	0	0		2	0	2	1	0	1	1	1	1	1	1	1	1	1	1	1	1	1	1	1	1	1	1	1	1	0	1	19	29	8
198	26	1	0	1	2	0	2	0	2	1	0	1	0	1	1	1	1	1	1	1	1	1	1	1	0	1	1	1	1	1	1	1	0	18	28	9
199	27	0	1	0	4	0	2	0	2	1	0	1	1	1	1	1	1	1	1	1	1	1	0	1	1	1	0	1	1	1	1	0	0	16	24	9
200	61	1	2	0	1	0	2	0	2	1	0	1	0	1	1	1	1	1	1	1	1	1	1	1	0	1	1	1	0	1	0	1	0	16	24	7
